# Supplementary material
Source: PubMed Central journal article supplement (PMC4826471)

Figure 4 Iwafuchi-Doi/Zaret

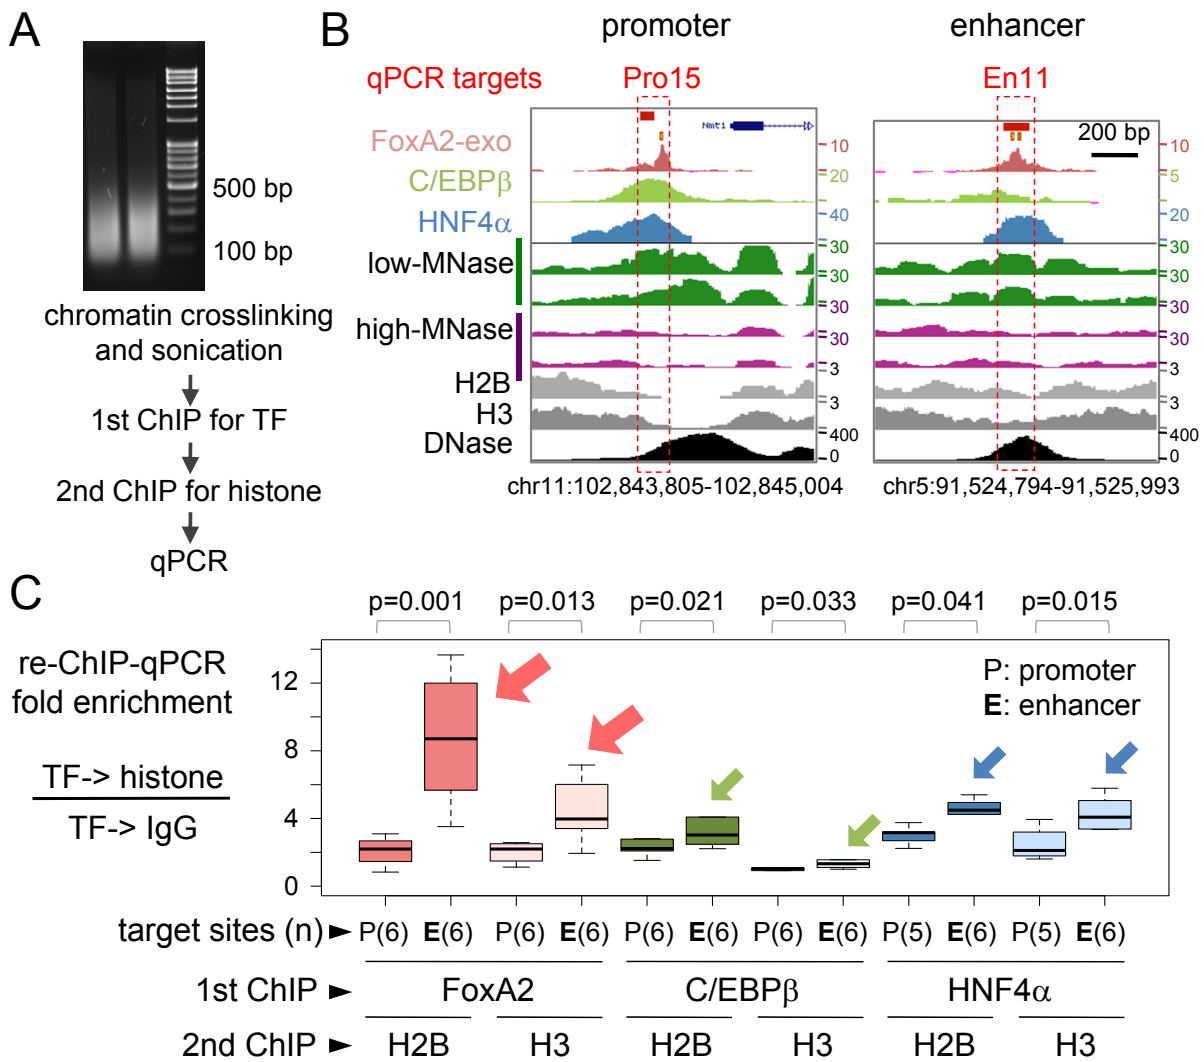

Supplement: NIHMS766462-supplement-4.pdf [file NIHMS766462-supplement-4.pdf]
